# Supplementary material
Source: PubMed Central journal article supplement (PMC7397743)
Supplement: supp_RA120000691_158856_2_supp_554294_qcfz1t.pdf [file supp_RA120000691_158856_2_supp_554294_qcfz1t.pdf]

## Supplemental Material

The lipid transfer properties of CETP define the concentration and composition of plasma lipoproteins.

Richard E. Morton and Yan Liu

### Supplemental Table S1

qPCR primers for the indicated golden Syrian hamster (*Mesocricetus auratus*) gene.

| <u>Gene</u>   | <u>Forward primer 5' to 3'</u> | <u>Reverse primer 5' to 3'</u> |
|---------------|--------------------------------|--------------------------------|
| <i>CYP7A1</i> | TACTAGATAGCATCATCAAGGAGGCTC    | CCATCCTCAAGGTGCAGAGTG          |
| <i>MTTP</i>   | AGAGGAAAACCTGGACTCCTATG        | AGCATTGGACATCAGATCACT          |
| <i>LDLR</i>   | AAGGCAGCTACAAGTGCGAG           | TTCCTTACCTCGTGGCGATT           |
| <i>SCARB1</i> | ATGCCCTCGCTCATCAAACA           | CCCGCACTATTGGCTTCTCA           |
| <i>TNF</i>    | CGGGCTGTACCTGGTTTACTC          | GGGCTCTTGATGGCGGAC             |
| <i>ADGRE1</i> | TTCCTGCTATGTCGTGCTGTTC         | TTGTCCGTCTTGTCTACACCCA         |
| <i>IL1B</i>   | AGTCATTGTGGCTGTGGAGA           | TGTTGTTTTCATCTCGGAGCCT         |
| <i>ACTB</i>   | GTGGATCAGCAAGCAGGAGT           | CTCAGTAACAGTCCGCCTAGAA         |

## **Supplemental Table S2**

Mass spectrometry quantification of HDL proteins. See the attached spreadsheet showing accession number, the number unique peptides detected, the percentage of sequence coverage, and relative abundance values for each identified protein.

### Supplemental Table S3

Cholesterol efflux. Shown are the percentages of <sup>3</sup>H-cholesterol effluxed from RAW264.7 macrophages in the presence of 2% ApoB-depleted serum from the indicated adenovirus group. Values are mean ± SEM, n= 9 (Ad-null), 11 (Ad-haCETP), 7 (Ad-huCETP). <sup>a</sup>- p< 0.05 vs. null, <sup>b</sup>- p< 0.01 vs. haCETP

| <u>Adenovirus</u> | Total efflux<br><u>(%)</u> | ABCA1 independent<br><u>(%)</u> | ABCA1 dependent<br><u>(%)</u> |
|-------------------|----------------------------|---------------------------------|-------------------------------|
| null              | 14.2 ± 0.8                 | 8.8 ± 0.5                       | 5.4 ± 0.4                     |
| haCETP            | 15.3 ± 1.1                 | 9.8 ± 0.6                       | 5.5 ± 0.7                     |
| huCETP            | 13.4 ± 0.9                 | 7.1 ± 0.6 <sup>a,b</sup>        | 6.3 ± 0.5                     |
